# Supplementary material
Source: PubMed Central journal article supplement (PMC6628842)
Supplement: nmz002_supplemental_file.pdf [file nmz002_supplemental_file.pdf]

## Supplementary Data

### Supplemental Methods: Details of Search Methods

The search was conducted across six databases (Medline via Ovid, Embase via Ovid, CAB Abstracts via Ovid, Cochrane Library via Wiley, CINAHL via EBSCO, and Web of Science).

#### Ovid MEDLINE(R) and Epub Ahead of Print, In-Process & Other Non-Indexed Citations, Daily and Versions(R) (n=248)

1. exp Blood Glucose/
2. "blood sugar".tw.
3. "blood glucose".tw.
4. ("glycated hemoglobin" or "glycated haemoglobin").tw.
5. (hyperglycemi\* or hyperglycaemi\*).tw.
6. (A1C or HbA1c).tw.
7. ("glycosylated hemoglobin" or "glycosylated haemoglobin").tw.
8. exp Glycated Hemoglobin A/
9. or/1-8
10. exp Diabetes Mellitus, Type 2/
11. (diabet\* adj2 "type 2").tw.
12. "adult onset diabetes".tw.
13. ("non insulin dependent diabetes mellitus" or NIDDM).tw.
14. (t2d or t2dm).tw.
15. or/10-14
16. 9 and 15
17. exp Dietary Proteins/
18. "dietary protein\*".tw.
19. (high adj2 protein\*).tw.
20. "protein rich".tw.
21. or/17-20
22. exp Diet/
23. exp Diet Therapy/
24. "diet therapy".fs.
25. diet\*.tw.
26. or/22-25
27. 21 and 26
28. exp Diet, High-Protein/
29. 27 or 28
30. 16 and 29
31. Animals/
32. Humans/
33. 31 and 32
34. 31 not 33
35. 30 not 34
36. ..dedup 35

## Supplementary Data

### Embase Classic+Embase via Ovid (n=437)

1. exp glucose blood level/
2. "blood sugar".tw.
3. "blood glucose".tw.
4. ("glycated hemoglobin" or "glycated haemoglobin").tw.
5. (hyperglycemi\* or hyperglycaemi\*).tw.
6. (A1C or HbA1c).tw.
7. exp glycosylated hemoglobin/
8. ("glycosylated hemoglobin" or "glycosylated haemoglobin").tw.
9. or/1-8
10. exp non insulin dependent diabetes mellitus/
11. (diabet\* adj2 "type 2").tw.
12. "adult onset diabetes".tw.
13. ("non insulin dependent diabetes mellitus" or NIDDM).tw.
14. (t2d or t2dm).tw.
15. or/10-14
16. 9 and 15
17. exp protein intake/
18. "dietary protein\*".tw.
19. (high adj2 protein\*).tw.
20. "protein rich".tw.
21. or/17-20
22. diet/
23. exp diet therapy/
24. diet\*.tw.
25. or/22-24
26. exp protein diet/
27. 21 and 25
28. 26 or 27
29. 16 and 28
30. exp animal/
31. human/
32. 30 not 31
33. 29 not 32
34. ..dedup 33

### CINAHL via EBSCO (n=140)

1. (MH "Blood Glucose")
2. (MH "Blood Glucose Monitoring+")
3. TI "blood sugar" OR AB "blood sugar"
4. TI "blood glucose" OR AB "blood glucose"
5. TI ( "glycated hemoglobin" or "glycated haemoglobin" ) OR AB ( "glycated hemoglobin" or "glycated haemoglobin" )

## Supplementary Data

6. TI ( (hyperglycemi\* or hyperglycaemi\* ) OR AB ( (hyperglycemi\* or hyperglycaemi\* ) ) )
7. TI ( ("glycosylated hemoglobin" or "glycosylated haemoglobin" ) OR AB ( ("glycosylated hemoglobin" or "glycosylated haemoglobin" ) ) )
8. S1 OR S2 OR S3 OR S4 OR S5 OR S6 OR S7
9. (MH "Diabetes Mellitus, Type 2")
10. TI (diabet\* N2 "type 2") OR AB (diabet\* N2 "type 2")
11. TI "adult onset diabetes" OR AB "adult onset diabetes"
12. TI ( ("non insulin dependent diabetes mellitus" or NIDDM) ) OR AB ( ("non insulin dependent diabetes mellitus" or NIDDM) )
13. TI ( (t2d or t2dm) ) OR AB ( (t2d or t2dm) )
14. S9 OR S10 OR S11 OR S12 OR S13
15. S8 AND S14
16. (MH "Dietary Proteins+")
17. (MH "Amino Acids+")
18. TI "dietary protein\*" OR AB "dietary protein\*"
19. TI high N2 protein\* OR AB high N2 protein\*
20. TI "protein rich" OR AB "protein rich"
21. S16 OR S17 OR S18 OR S19 OR S20
22. (MH "Diet Therapy+")
23. (MH "Diet+")
24. TI diet\* OR AB diet\*
25. S22 OR S23 OR S24
26. S21 AND S25
27. S15 AND S26
28. (MH "Animals+")
29. (MH "Human")
30. S28 AND S29
31. S28 NOT S30
32. S27 NOT S31

## Cochrane Library via Wiley (n=75)

1. MeSH descriptor: [Blood Glucose] explode all trees
2. "blood sugar":ti,ab,kw (Word variations have been searched)
3. "blood glucose":ti,ab,kw (Word variations have been searched)
4. "glycated hemoglobin" or "glycated haemoglobin":ti,ab,kw (Word variations have been searched)
5. hyperglycemi\* or hyperglycaemi\*:ti,ab,kw (Word variations have been searched)
6. A1C or HbA1c:ti,ab,kw (Word variations have been searched)
7. "glycosylated hemoglobin" or "glycosylated haemoglobin":ti,ab,kw (Word variations have been searched)
8. MeSH descriptor: [Glycated Hemoglobin A] explode all trees
9. #1 or #2 or #3 or #4 or #5 or #6 or #7 or #8

## Supplementary Data

10. MeSH descriptor: [Diabetes Mellitus, Type 2] explode all trees
11. diabet\* near/2 "type 2":ti,ab,kw (Word variations have been searched)
12. "adult onset diabetes":ti,ab,kw (Word variations have been searched)
13. "non insulin dependent diabetes mellitus" or NIDDM:ti,ab,kw (Word variations have been searched)
14. t2d or t2dm:ti,ab,kw (Word variations have been searched)
15. #10 or #11 or #12 or #13 or #14
16. #9 and #15
17. MeSH descriptor: [Dietary Proteins] explode all trees
18. "dietary protein\*":ti,ab,kw (Word variations have been searched)
19. high near/2 protein\*:ti,ab,kw (Word variations have been searched)
20. "protein rich":ti,ab,kw (Word variations have been searched)
21. #17 or #18 or #19 or #20
22. MeSH descriptor: [Diet] explode all trees
23. MeSH descriptor: [Diet Therapy] explode all trees
24. Any MeSH descriptor with qualifier(s): [Diet therapy - DH]
25. diet\*:ti,ab,kw (Word variations have been searched)
26. #22 or #23 or #24 or #25
27. #21 and #26
28. MeSH descriptor: [Diet, High-Protein] explode all trees
29. #27 or #28
30. #16 and #19
31. MeSH descriptor: [Animals] explode all trees
32. MeSH descriptor: [Humans] explode all trees
33. #31 and #32
34. #31 not #33
35. #30 not #34

### CAB Abstracts via Ovid (n=118)

1. exp blood sugar/
2. "blood sugar".tw.
3. "blood glucose".tw.
4. ("glycated hemoglobin" or "glycated haemoglobin").tw.
5. (hyperglycemi\* or hyperglycaemi\*).tw.
6. (A1C or HbA1c).tw.
7. ("glycosylated hemoglobin" or "glycosylated haemoglobin").tw.
8. or/1-7
9. exp type 2 diabetes/
10. (diabet\* adj2 "type 2").tw.
11. "adult onset diabetes".tw.
12. ("non insulin dependent diabetes mellitus" or NIDDM).tw.
13. (t2d or t2dm).tw.
14. or/9-13

## Supplementary Data

15. 8 and 14
16. dietary protein/
17. "dietary protein\*".tw.
18. (high adj2 protein\*).tw.
19. "protein rich".tw.
20. exp protein intake/
21. or/16-20
22. exp diet/
23. exp therapeutic diets/
24. diet\*.tw.
25. or/22-24
26. 21 and 25
27. 15 and 26
28. exp animals/
29. exp man/
30. 28 and 29
31. 28 not 30
32. 27 not 31
33. ..dedup 32

## Web of Science (n=262)

1. TS=("blood sugar" OR "blood glucose" OR "glycated hemoglobin" OR "glycated haemoglobin" OR hyperglycemi\* OR hyperglycaemi\* OR A1C or HbA1C or "glycosylated hemoglobin" OR "glycosylate haemoglobin")
2. TS=((diabet\* NEAR/2 "type 2") OR "adult onset diabetes" OR "non insulin dependent diabetes mellitus" OR NIDDM OR T2D OR T2DM)
3. TS=("dietary protein\*" OR (high NEAR/2 protein\*) OR "protein rich")
4. #1 AND #2 AND #3
